# Supplementary material
Source: PubMed Central journal article supplement (PMC4875322)
Supplement: 13238_2010_75_MOESM1_ESM.pdf [file 13238_2010_75_MOESM1_ESM.pdf]

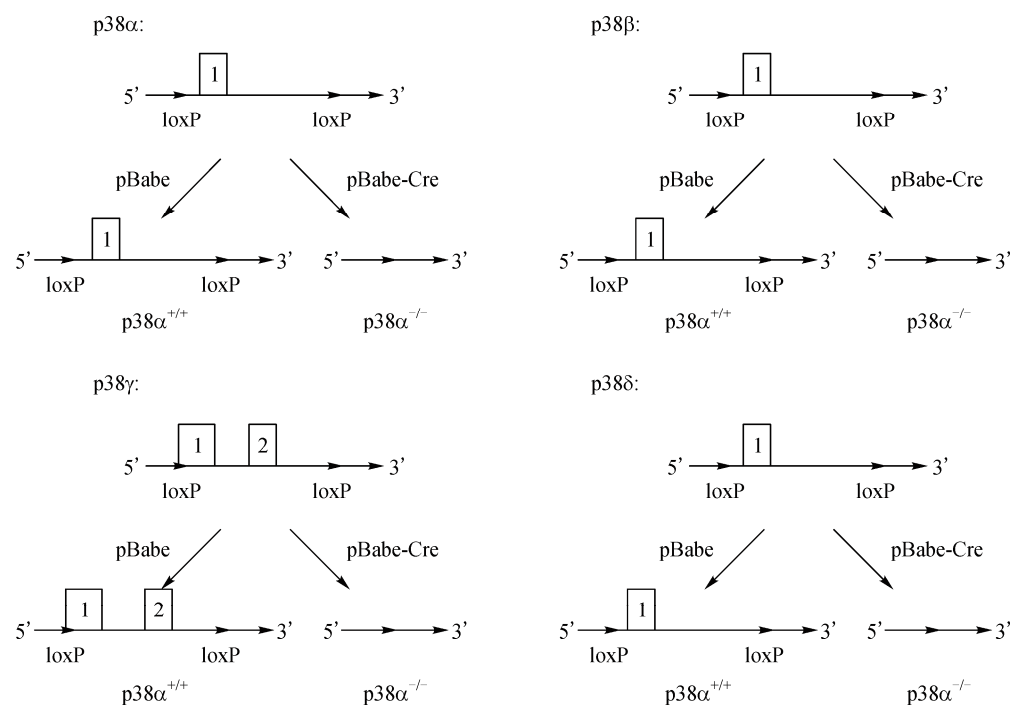

**Supplemental Figure 1. Schematic presentation of the strategy for the generation of isogenic MEF cell lines that are either wild type or null for each p38 isoform.** MEF cells were isolated from mice harboring a floxed allele of p38α, p38β, p38δ or p38γ. These cells were then transduced with a Cre-encoding retrovirus (pBabe-Cre) or a vector control retrovirus (pBabe) to generate p38- null (p38<sup>-/-</sup>) or wild type (p38<sup>+/+</sup>) MEF cell lines, respectively. Locations of the loxP sites (black arrows) and exons between the 2 loxP sites (numbered boxes) are indicated for the genomic locus of each p38 isoform.

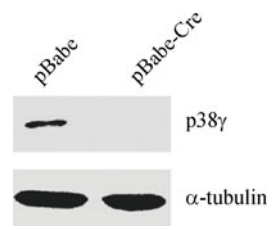

**Supplemental Figure 2.** Western blot analysis of MEF cells isolated from a mouse harboring a floxed allele of p38 $\gamma$ , after transduction of a control (pBabe) or Cre-encoding (pBabe-Cre) retrovirus, showing loss of p38 $\gamma$  protein expression in cells transduced with Cre.
